# Supplementary material for: Polarization-driven twisted states in ferroelectric nematic liquid crystals under confinement
Source: Research Square preprint supplement (doi:10.21203/rs.3.rs-8431209/v1), 2026-01-12
Supplement: Supplementary file 1 [file a018a63049cbc838b35da456.pdf]

# Supplementary Figures: Polarization-driven twisted states in ferroelectric nematic liquid crystals under confinement

Anna Savchenko<sup>1,+</sup>, Ebba Grönfors<sup>2,+</sup>, Rachel Tuffin<sup>3</sup>, Melanie Klasen-Memmer<sup>3</sup>, Per Rudquist<sup>2</sup>, and Frank Giesselmann<sup>1,\*</sup>

<sup>1</sup>Institute of Physical Chemistry, University of Stuttgart, 70569 Stuttgart, Germany

<sup>2</sup>Department of Microtechnology and Nanoscience, Chalmers University of Technology, 41296 Gothenburg, Sweden

<sup>3</sup>Merck Electronics KGaA, 64293 Darmstadt, Germany

\*f.giesselmann@ipc.uni-stuttgart.de

+these authors contributed equally to this work

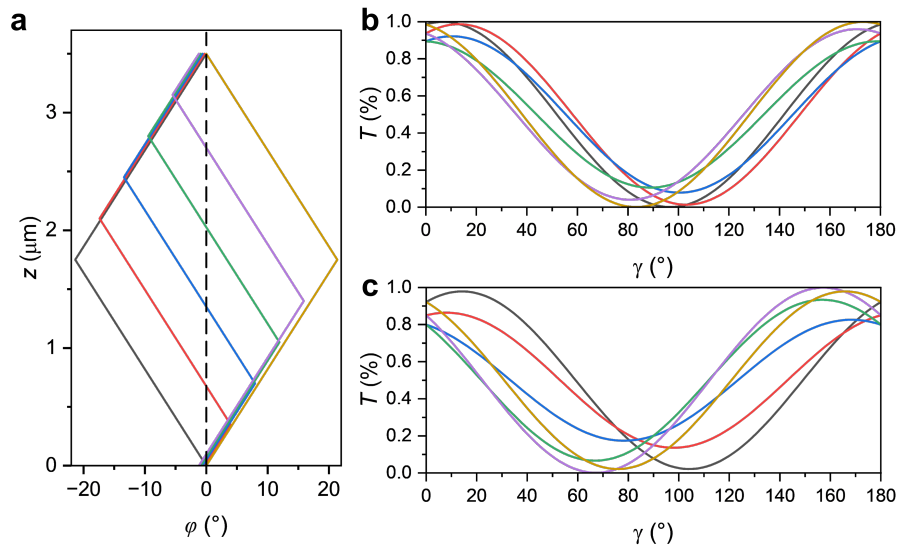

**Figure 1.** Simulated transmitted light intensity in a synpolar cell with thickness  $3.5 \mu\text{m}$  for different combinations of mesotwisted structures. a) The simulated director structures. Here  $\phi$  represents the angle between the local director and the bottom alignment and  $z$  the distance from the bottom surface. In each structure the absolute value of the local twist is the same everywhere, about  $12^\circ/\mu\text{m}$ . The dashed black line shows the rubbing direction. A small offset has been added to  $\phi$  for each structure to make each line visible, but in the simulations  $\phi_{z=0} = \phi_{z=3.5} = 0$  for all structures. b) The simulated transmitted light intensity for the wavelength 500 nm. c) The simulated transmitted light intensity for the wavelength 600 nm.

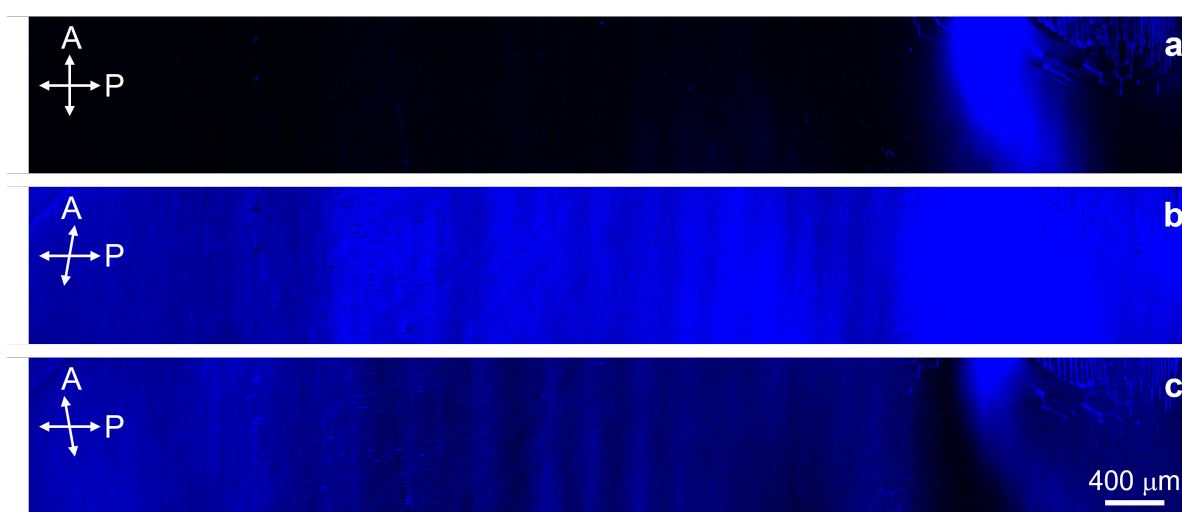

**Figure 2.** Panorama picture of the thinner half of the synpolar wedge cell filled with the  $N_F$  phase under crossed (a) and  $\pm 25^\circ$  decrossed polarizers (b,c) with monochromatic light. The wavelength is  $\lambda = 450$  nm.
